# Supplementary material for: miR-503 represses CUG-binding protein 1 translation by recruiting CUGBP1 mRNA to processing bodies
Source: PubMed Central journal article supplement — Mol Biol Cell. 2012 Jan 1;23(1):151–62. doi: 10.1091/mbc.E11-05-0456 (PMC3248894; doi:10.1091/mbc.e11-05-0456), 2012-01-01
Supplement: supp_E11-05-0456_CombinedSupMats.pdf [file supp_E11-05-0456_CombinedSupMats.pdf]

## SUPPLEMENTAL FIGURE

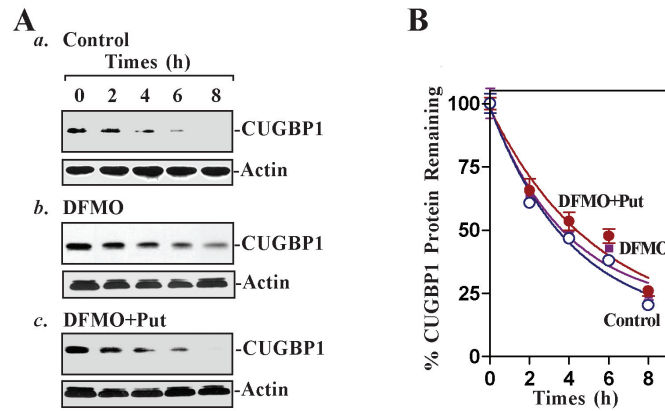

**Supplemental Figure 1.** Stability of CUGBP1 protein after polyamines depletion. (A) Assessment of half-life of CUGBP1 protein: *a*) untreated control; *b*) cells treated with DFMO for 4 days; and *c*) cells exposed to DFMO plus putrescine (Put) for 4 days. After treatment with cycloheximide (50  $\mu$ g/ml) for the times indicated, whole-cell lysates were harvested for Western blot analysis. (B) Quantitative analysis of the immunoblotting signals in panel A, as measured by densitometry. Values are means  $\pm$  SE of data from three separate experiments; the relative levels of CUGBP1 were corrected for protein loading by measuring  $\beta$ -actin densitometric signals.

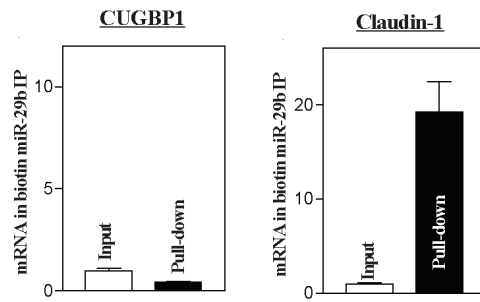

**Supplemental Figure 2.** Association of miR-29b with mRNAs of CUGBP1 and claudin-1. After cells were transfected with biotinylated miR-29b for 48 h, levels of CUGBP1 and claudin-1 mRNAs in the materials pulled down by biotin-miR-29b were measured by Q-PCR analysis. Values are means  $\pm$  SE from three separate experiments. \*  $P < 0.05$  compared with cells transfected with control scramble oligomer.

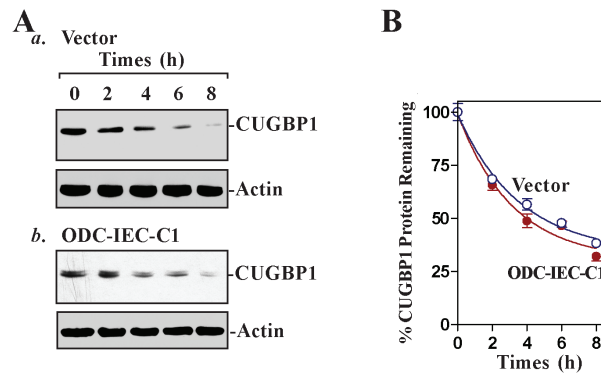

**Supplemental Figure 3.** Effect of increasing cellular polyamines on CUGBP1 protein stability. **(A)** Changes in the half-life of CUGBP1 protein: *a*) vector alone; and *b*) stable ODC-IEC cells. After incubation in the presence of cycloheximide IEC whole-cell lysates were harvested for Western blot analysis. **(B)**: Quantitative analysis of the Western blotting signals in panel **A**. Values are means  $\pm$  SE of data from three separate experiments.

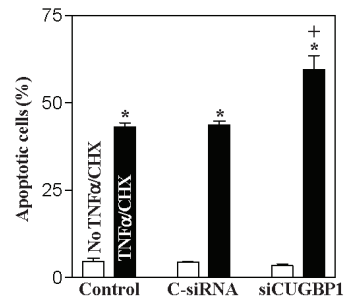

**Supplemental Figure 4.** CUGBP1 silencing increases the susceptibility of IEC-6 cells to TNF- $\alpha$ /CHX-induced apoptosis. Cells were transfected with siRNA targeting CUGBP1 (siCUGBP1) or control-siRNA (C-siRNA); 48 h later, apoptosis was measured after 4 h of treatment with TNF- $\alpha$ /CHX. Values are means  $\pm$  SE of data from 3 experiments. \*  $P < 0.05$  compared with cells untreated with TNF- $\alpha$ /CHX; +  $P < 0.05$  compared with cells transfected with C-siRNA and then exposed to TNF- $\alpha$ /CHX.

**Supplemental Table 1: Primer Sequences for Generating Various Constructs**

| Name                     | Sequences                                                          |
|--------------------------|--------------------------------------------------------------------|
| CUGBP1                   | GAGTACCATGGAAGCCCTCA<br>ATGAACAAACGGCAGGAATC                       |
| CUGBP1<br>mRNA CR FL     | GCTAG C CTGGACCACCCAGACCAAC<br>CTCGA G CAGTAGGGCTTACTATCATTCTTCG   |
| CUGBP1<br>mRNA 3'-UTR FL | GCTAG C TCCCCTCTGAGACTGGAGTG<br>CTCGA G GCTGTCTTTAAAACGAAGCACA     |
| CR-F1                    | GCTAG C ACCACCCAGACCAACCAGAT<br>CTCGA G GAGGGGACTGCTGGATGTAG       |
| CR-F2                    | GCTAG C CCAAGTGGTACCAATGCTCTC<br>CTCGA G CAGATTCTGGTTGTACAGAGTAGGG |
| CR-F3                    | GCTAG C CCCTCCCTACTCTGTACAACCA<br>CTCGA G GCAGTAAGTCCTGGTCTCCAA    |
| MS2-CUGBP1(CR)           | CTCGAG ACCACCCAGACCAACCAGAT<br>CTCGAG ATTCTTCGAACGTTTGAGCTG        |
